# Supplementary material for: Two-dimensional Janus semiconductor BiTeCl and BiTeBr monolayers: a first-principles study on their tunable electronic properties via an electric field and mechanical strain
Source: Royal Society of Chemistry journal article supplement (doi:10.1039/d1cp01368h), 2021-01-01
Supplement: d1cp01368h1.pdf [file d1cp01368h1.pdf]

## Supplementary Material

### Two-dimensional Janus Semiconductors BiTeCl and BiTeBr monolayers: A first-principles study of the tunable electronic properties via electric field and mechanical strain

A. Bafekry,<sup>1,2,\*</sup> S. Karbasizadeh,<sup>3</sup> C. Stampfl,<sup>4</sup> M. Faraji,<sup>5</sup> D. M. Hoat,<sup>6,7</sup> I. Abdolhosseini Sarsari,<sup>3</sup> S.A.H Feghi,<sup>1</sup> and M. Ghergherehchi<sup>8,†</sup>

<sup>1</sup> Department of Radiation Application, Shahid Beheshti University, Tehran, Iran

<sup>2</sup> Department of Physics, University of Antwerp, Groenenborgerlaan 171, B-2020 Antwerp, Belgium

<sup>3</sup> Department of Physics, Isfahan University of Technology, Isfahan, 84156-83111, Iran

<sup>4</sup> School of Physics, The University of Sydney, New South Wales 2006, Australia

<sup>5</sup> Micro and Nanotechnology Graduate Program, TOBB University of Economics and Technology, Sogutozu Caddesi No 43 Sogutozu, 06560, Ankara, Turkey

<sup>6</sup> Institute of Theoretical and Applied Research, Duy Tan University, Ha Noi 100000, Viet Nam

<sup>7</sup> Faculty of Natural Sciences, Duy Tan University, Da Nang 550000, Viet Nam

<sup>8</sup> Department of Electrical and Computer Engineering, Sungkyunkwan University, 16419 Suwon, Korea

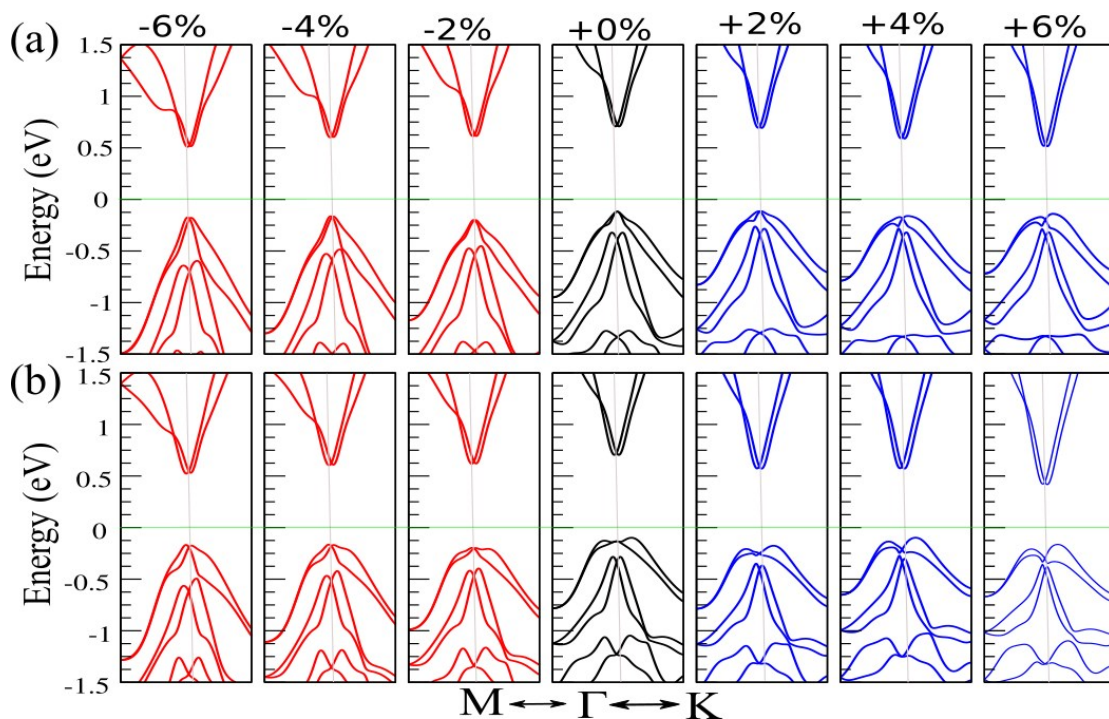

Figure S1: The electronic band structure of the BiTeCl monolayer under the influence of uniaxial strain.

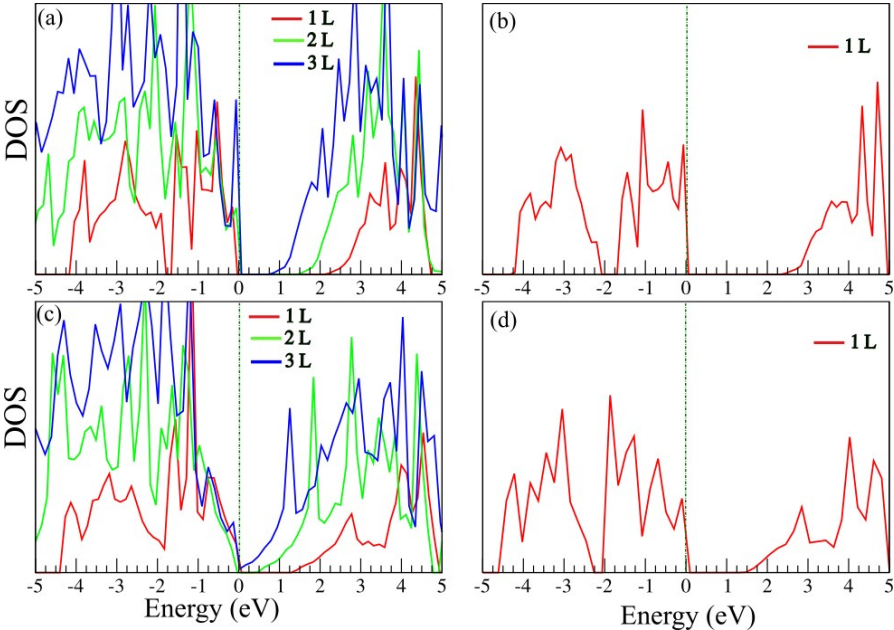

Figure S2: Electronic density of states using HSE of the (a) BiTeBr and (b) BiTeCl. Electronic density of states using HSE+SOC of (c) BiTeBr (d) BiTeCl monolayers.
